# Supplementary material for: The Clinical Efficacy and Safety of Anti-Viral Agents for Non-Hospitalized Patients with COVID-19: A Systematic Review and Network Meta-Analysis of Randomized Controlled Trials
Source: MDPI journal article supplement (doi:10.3390/v14081706), 2022-08-02
Supplement: s1 [file s1]

**Table S2. Registered clinical trials to investigate the efficacy of anti-viral agents for COVID-19 in non-hospitalized adult patients, not yet published.**

| Registration Number                | Country                                                                                                                                                                                                             | Local version of which trial | Study Design                                                     | Subjects                                | Timing                                             | Study drug                                                                 | Comparator       | Primary outcome                                                                        | Status              |
|------------------------------------|---------------------------------------------------------------------------------------------------------------------------------------------------------------------------------------------------------------------|------------------------------|------------------------------------------------------------------|-----------------------------------------|----------------------------------------------------|----------------------------------------------------------------------------|------------------|----------------------------------------------------------------------------------------|---------------------|
| NCT05011513<br>EUCTR2021-002857-28 | Argentina, Brazil, Bulgaria, Colombia, Czechia, Hungary, Japan, Republic of Korea, Malaysia, Mexico, Poland, Puerto Rico, Russian Federation, South Africa, Spain, Taiwan, Thailand, Turkey, Ukraine, United States | EPIC-SR                      | Phase 2-3, quadruple-blind, randomized, placebo-controlled trial | Non-hospitalized patients with Covid-19 | within 5 days after the onset of signs or symptoms | 300 mg of nirmatrelvir plus 100 mg of ritonavir, every 12 hours for 5 days | Placebo          | Time to sustained alleviation of all targeted COVID-19 signs/symptoms [through Day 28] | Recruiting          |
| CTRI/2021/05/033693                | India                                                                                                                                                                                                               | CBCC/2021/008                | Phase 3, open label, randomized controlled trial                 | Non-hospitalized patients with Covid-19 | Not mentioned                                      | molnupiravir (800 mg) orally twice daily for 5 days                        | Standard of care | Rate of hospitalization up to Day 14                                                   | Open to Recruitment |
| CTRI/2021/05/033739                | India                                                                                                                                                                                                               | HCR/III/MOLCOV/04/2021-01    | Phase 3, open label, randomized controlled trial                 | Non-hospitalized patients with Covid-19 | Not mentioned                                      | molnupiravir (800 mg) orally twice daily for 5 days                        | Standard of care | Rate of hospitalization up to Day 14                                                   | Completed           |
| CTRI/2021/05/033904                | India                                                                                                                                                                                                               | MOLN/MSN/P3-M1/2021          | Phase 3, open label, randomized controlled trial                 | Non-hospitalized patients with Covid-19 | within 7 days after the onset of signs or symptoms | molnupiravir (800 mg) orally twice daily for 5 days                        | Standard of care | Rate of hospitalization up to Day 14                                                   | Completed           |

|                     |       |                     |                                                  |                                                                                                                      |                                                      |                                                     |                  |                                                          |                       |
|---------------------|-------|---------------------|--------------------------------------------------|----------------------------------------------------------------------------------------------------------------------|------------------------------------------------------|-----------------------------------------------------|------------------|----------------------------------------------------------|-----------------------|
| CTRI/2021/06/033938 | India | DRL-MOL-002         | Phase 3, open label, randomized controlled trial | Non-hospitalized patients with Covid-19                                                                              | within 5 days after the onset of signs or symptoms   | molnupiravir (800 mg) orally twice daily for 5 days | Standard of care | Rate of hospitalization up to Day 14                     | Open to Recruitment   |
| CTRI/2021/06/033992 | India | OPT-MOL-001         | Phase 3, open label, randomized controlled trial | Non-hospitalized patients with Covid-19                                                                              | within 5 days after the onset of signs or symptoms   | molnupiravir (800 mg) orally twice daily for 5 days | Standard of care | Rate of hospitalization up to Day 14                     | Closed to Recruitment |
| CTRI/2021/06/034015 | India | NV-05-1154-2021     | Phase 3, open label, randomized controlled trial | Non-hospitalized patients with mild COVID-19 with a score of 2 or 3 on the 10-point ordinal scale of clinical status | within 3-5 days after the onset of signs or symptoms | molnupiravir (800 mg) orally twice daily for 5 days | Standard of care | Rate of hospitalization up to Day 14                     | Open to Recruitment   |
| CTRI/2021/06/034130 | India | BDR/CT/004/MOL/2021 | Phase 3, open label, randomized controlled trial | Non-hospitalized patients with Covid-19                                                                              | within 5 days after the onset of signs or symptoms   | molnupiravir (800 mg) orally twice daily for 5 days | Standard of care | Rate of hospitalization up to Day 14                     | Completed             |
| CTRI/2021/07/034588 | India | CR216-21            | Phase 3, open label, randomized controlled trial | Non-hospitalized patients with Covid-19 who had at least one risk factor for disease progression                     | within 5 days after the onset of signs or symptoms   | molnupiravir (800 mg) orally twice daily for 5 days | Standard of care | Rate of hospitalization from randomization up to Day 14. | Completed             |
