# Supplementary material for: The Clinical Efficacy and Safety of Anti-Viral Agents for Non-Hospitalized Patients with COVID-19: A Systematic Review and Network Meta-Analysis of Randomized Controlled Trials
Source: MDPI journal article supplement (doi:10.3390/v14081706), 2022-08-02
Supplement: s1 [file s1]

**Table S1. Search strategy**

Search strategy in Pubmed (Search date: 2022/05/28)

| PICO      | Search | Query                                                              | Items found | Time     |
|-----------|--------|--------------------------------------------------------------------|-------------|----------|
|           | 28     | #22 AND #27                                                        | 346         | 10:10:07 |
|           | 27     | #23 OR #24 OR #25 OR #26                                           | 1,571,527   | 10:09:55 |
|           | 26     | random*                                                            | 1,565,640   | 10:09:50 |
|           | 25     | RCT                                                                | 30,622      | 10:09:46 |
|           | 24     | Randomized Controlled Trial*                                       | 844,127     | 10:09:41 |
|           | 23     | Randomized Controlled Trial (MeSH)                                 | 756,831     | 10:09:35 |
| <b>PI</b> | 22     | #10 AND #21                                                        | 2,920       | 10:09:23 |
|           | 21     | #11 OR #12 OR #13 OR #14 OR #15 OR #16 OR #17 OR #18 OR #19 OR #20 | 3,031       | 10:09:14 |
|           | 20     | 'PF-07321332'                                                      | 121         | 10:07:06 |
|           | 19     | Paxlovid                                                           | 69          | 10:07:00 |
|           | 18     | nirmatrelvir                                                       | 109         | 10:06:49 |
|           | 17     | 'EIDD-2801'                                                        | 229         | 10:06:46 |
|           | 16     | 'MK-4482'                                                          | 213         | 10:06:40 |
|           | 15     | Lagevrio                                                           | 211         | 10:06:34 |
|           | 14     | Molnupiravir                                                       | 211         | 10:06:28 |
|           | 13     | 'GS-5734'                                                          | 2,806       | 10:06:18 |
|           | 12     | Veklury                                                            | 2,802       | 10:06:09 |
| <b>I</b>  | 11     | Remdesivir                                                         | 2,802       | 10:05:47 |
|           | 10     | #1 OR #2 OR #3 OR #4 OR #9                                         | 282,880     | 10:05:39 |
|           | 9      | #5 AND (#6 OR #7 OR #8)                                            | 4,908       | 10:05:25 |
|           | 8      | infection*                                                         | 2,264,746   | 10:05:16 |
|           | 7      | viral                                                              | 963,005     | 10:05:11 |
|           | 6      | virus                                                              | 1,340,862   | 10:05:07 |
|           | 5      | corona                                                             | 16,788      | 10:04:59 |
|           | 4      | sars-cov-2                                                         | 163,296     | 10:04:51 |
|           | 3      | covid*                                                             | 253,987     | 10:04:45 |
|           | 2      | coronavir*                                                         | 133,194     | 10:04:36 |
| <b>P</b>  | 1      | Coronavirus Infections [MeSH term]                                 | 178,679     | 10:04:15 |

Search strategy in Embase (Search date: 2022/05/28)

| PICO | No. | Query                                                                 | Results |
|------|-----|-----------------------------------------------------------------------|---------|
|      | #28 | #23 AND #27                                                           | 919     |
|      | #27 | #24 OR #25 OR #26                                                     | 2053410 |
|      | #26 | random*                                                               | 2040711 |
|      | #25 | rct                                                                   | 52944   |
|      | #24 | 'randomized controlled trial'/exp [Emtree term]                       | 713457  |
| PI   | #23 | #11 AND #22                                                           | 8065    |
|      | #22 | #12 OR #13 OR #14 OR #15 OR #16 OR #17 OR<br>#18 OR #19 OR #20 OR #21 | 8242    |
|      | #21 | 'pf-07321332'                                                         | 58      |
|      | #20 | paxlovid                                                              | 101     |
|      | #19 | nirmatrelvir                                                          | 178     |
|      | #18 | 'eidd-2801'                                                           | 89      |
|      | #17 | 'mk-4482'                                                             | 37      |
|      | #16 | lagevrio                                                              | 11      |
|      | #15 | molnupiravir                                                          | 343     |
|      | #14 | 'gs-5734'                                                             | 266     |
|      | #13 | veklury                                                               | 80      |
| I    | #12 | remdesivir                                                            | 7987    |
|      | #11 | #1 OR #2 OR #3 OR #4 OR #5 OR #10                                     | 323001  |
|      | #10 | #6 AND (#7 OR #8 OR #9)                                               | 6157    |
|      | #9  | infection*                                                            | 3088022 |
|      | #8  | viral                                                                 | 637168  |
|      | #7  | virus                                                                 | 1695483 |
|      | #6  | corona                                                                | 23526   |
|      | #5  | 'sars-cov-2'                                                          | 99635   |
|      | #4  | covid*                                                                | 259053  |
|      | #3  | coronavir*                                                            | 274294  |
|      | #2  | 'coronavirus disease 2019'/exp [emtree term]                          | 219391  |
| P    | #1  | 'coronavirinae'/exp [emtree term]                                     | 95128   |

Search strategy in **Web of Science Core Collection** (Search date: 2022/05/28)

| <b>PICO</b> | <b>#</b> | <b>Query</b>                                                          | <b>Results</b> |
|-------------|----------|-----------------------------------------------------------------------|----------------|
|             | #26      | #21 AND #25                                                           | 255            |
|             | #25      | #22 OR #23 OR #24                                                     | 1,987,769      |
|             | #24      | ALL=(random*)                                                         | 1,980,262      |
|             | #23      | ALL=(rct)                                                             | 32,398         |
|             | #22      | ALL=('randomized controlled trial')                                   | 475,803        |
| <b>PI</b>   | #21      | #9 AND #20                                                            | 2,501          |
|             | #20      | #10 OR #11 OR #12 OR #13 OR #14 OR #15 OR #16<br>OR #17 OR #18 OR #19 | 2,652          |
|             | #19      | ALL=('PF-07321332')                                                   | 34             |
|             | #18      | ALL=(Paxlovid)                                                        | 31             |
|             | #17      | ALL=(nirmatrelvir)                                                    | 40             |
|             | #16      | ALL=('EIDD-2801')                                                     | 48             |
|             | #15      | ALL=('MK-4482')                                                       | 24             |
|             | #14      | ALL=(Lagevrio)                                                        | 5              |
|             | #13      | ALL=(Molnupiravir)                                                    | 138            |
|             | #12      | ALL=('GS-5734')                                                       | 206            |
|             | #11      | ALL=(Veklury)                                                         | 22             |
| <b>I</b>    | #10      | ALL=(Remdesivir)                                                      | 2,446          |
|             | #9       | #1 OR #2 OR #3 OR #8                                                  | 321,626        |
|             | #8       | #4 AND (#5 OR #6 OR #7)                                               | 6,031          |
|             | #7       | ALL=(infection*)                                                      | 1,863,349      |
|             | #6       | ALL=(viral)                                                           | 451,586        |
|             | #5       | ALL=(virus)                                                           | 1,027,485      |
|             | #4       | ALL=(corona)                                                          | 59,971         |
|             | #3       | ALL=('sars-cov-2')                                                    | 81,105         |
|             | #2       | ALL=(covid*)                                                          | 282,252        |
| <b>P</b>    | #1       | ALL=(coronavir*)                                                      | 115,361        |

Search strategy in Cochrane Library (Search date: 2022/05/28)

| PICO | Search | Query                                                              |
|------|--------|--------------------------------------------------------------------|
| P    | #1     | Coronavirus Infections [MeSH term]                                 |
|      | #2     | coronavir*                                                         |
|      | #3     | covid*                                                             |
|      | #4     | sars-cov-2                                                         |
|      | #5     | corona                                                             |
|      | #6     | virus                                                              |
|      | #7     | viral                                                              |
|      | #8     | infection*                                                         |
|      | #9     | #5 AND (#6 OR #7 OR #8)                                            |
|      | #10    | #1 OR #2 OR #3 OR #4 OR #9                                         |
| I    | #11    | Remdesivir                                                         |
|      | #12    | Veklury                                                            |
|      | #13    | 'GS-5734'                                                          |
|      | #14    | Molnupiravir                                                       |
|      | #15    | Lagevrio                                                           |
|      | #16    | 'MK-4482'                                                          |
|      | #17    | 'EIDD-2801'                                                        |
|      | #18    | nirmatrelvir                                                       |
|      | #19    | Paxlovid                                                           |
|      | #20    | 'PF-07321332'                                                      |
|      | #21    | #11 OR #12 OR #13 OR #14 OR #15 OR #16 OR #17 OR #18 OR #19 OR #20 |
|      | #22    | #10 AND #21                                                        |

Cochrane Database of Systematic Reviews (CDSR): 16

Cochrane Central Register of Controlled Trials (CENTRAL): 334

Search strategy in **clinicaltrials.gov** (Search date: 2022/05/28)

Keyword: Remdesivir OR Veklury OR 'GS-5734' OR Molnupiravir OR Lagevrio OR 'MK-4482' OR 'EIDD-2801' OR nirmatrelvir OR Paxlovid OR 'PF-07321332' | Covid19

Result: 155 trials

Search strategy in **WHO International Clinical Trials Registry Platform**

(Search date: 2022/05/28)

Keyword: Remdesivir OR Veklury OR 'GS-5734' OR Molnupiravir OR Lagevrio OR 'MK-4482' OR 'EIDD-2801' OR nirmatrelvir OR Paxlovid OR 'PF-07321332'

Result: 157 trials
